# Supplementary material for: Convolutional neural networks driving thermally enhanced upconversion luminescence for temperature sensing: achieving high accuracy and robustness across a wide temperature range
Source: Royal Society of Chemistry journal article supplement (doi:10.1039/d3tc02980h), 2023-01-01
Supplement: d3tc02980h1.pdf [file d3tc02980h1.pdf]

## Supporting Information

### **Convolutional Neural Network Driving Thermally Enhanced Upconversion Luminescence for Temperature Sensing: Achieving High Accuracy and Robustness Across a Wide Temperature Range**

*Wei Xu<sup>1,\*</sup>, Junqi Cui<sup>1</sup>, Fengze Bai<sup>1</sup>, Longjiang Zheng<sup>1</sup>, Chunhai Hu<sup>1</sup>, Zhiguo Zhang<sup>2</sup>, Zhen Sun<sup>3</sup>, Yungang Zhang<sup>1</sup>*

1 School of Electrical Engineering, Yanshan University, Qinhuangdao, 066004, China

2 Condensed Mater Science and Technology Institute, Harbin Institute of Technology, Harbin 150001, China

3 College of Science, Yanshan University, Qinhuangdao, 066004, China

\*Corresponding author: xuwei@ysu.edu.cn

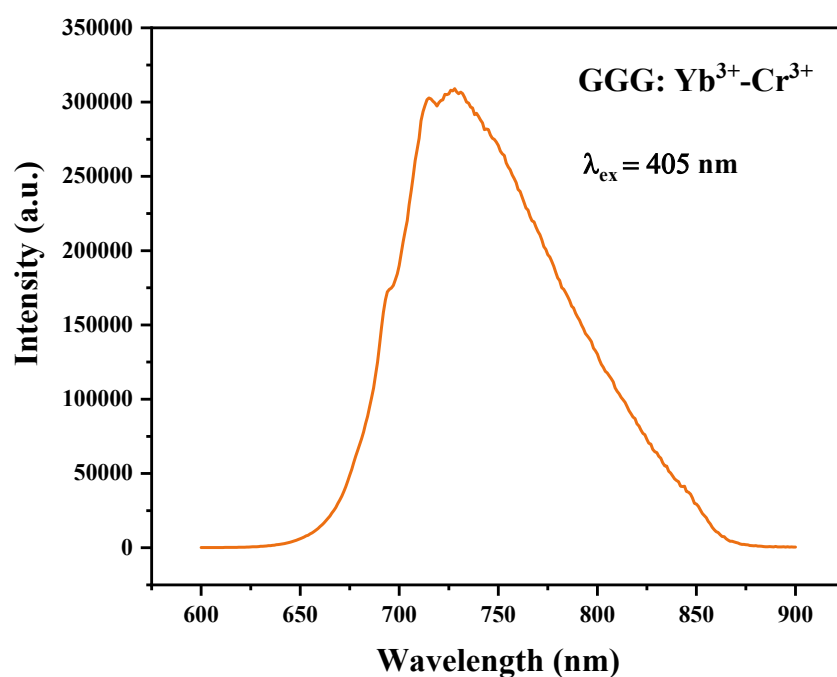

Figure. S1. The photoluminescence spectrum of Cr<sup>3+</sup> singly doped Gd<sub>3</sub>Ga<sub>5</sub>O<sub>12</sub> under 405 nm laser excitation.

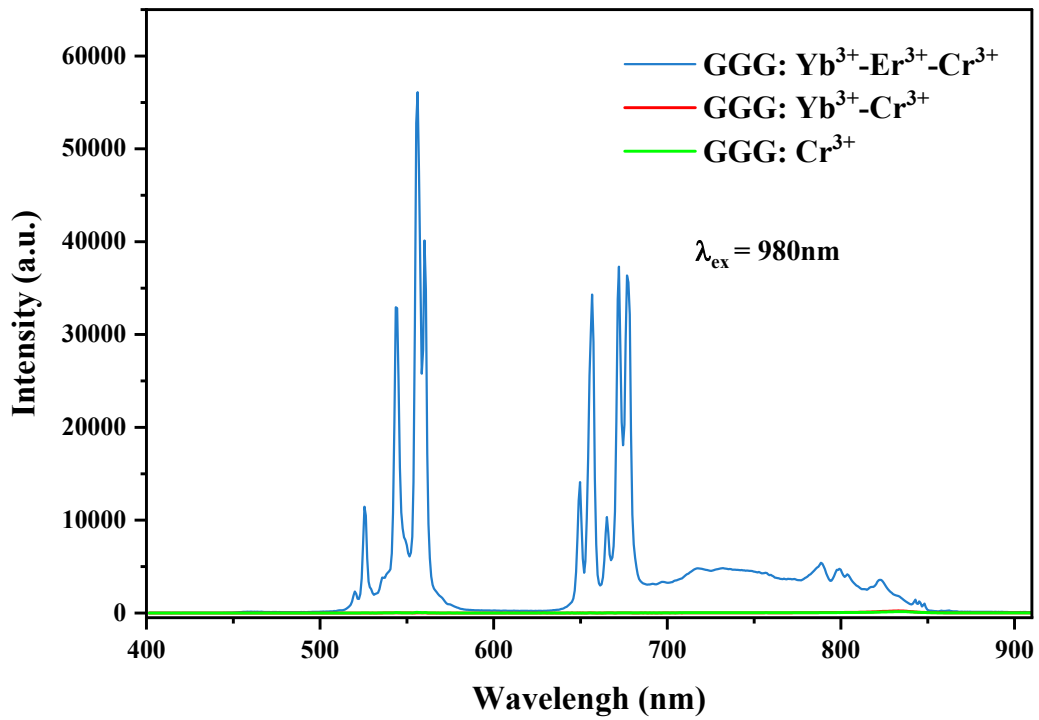

Figure. S2. The photoluminescence spectrum of GGG:Yb<sup>3+</sup>-Er<sup>3+</sup>-Cr<sup>3+</sup>, GGG: Yb<sup>3+</sup>-Cr<sup>3+</sup> and GGG: Cr<sup>3+</sup> under 980 nm laser excitation

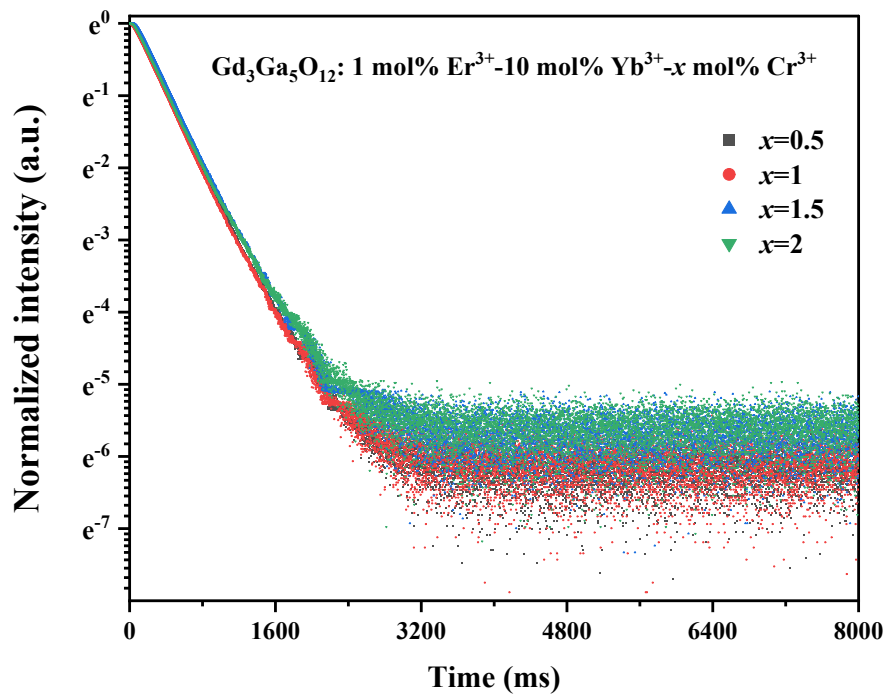

Figure. S3. Luminescence decay curves of Gd<sub>3</sub>Ga<sub>5</sub>O<sub>12</sub>: Yb<sup>3+</sup>-Er<sup>3+</sup>-Cr<sup>3+</sup> samples with different Cr<sup>3+</sup> doping concentrations at room temperature

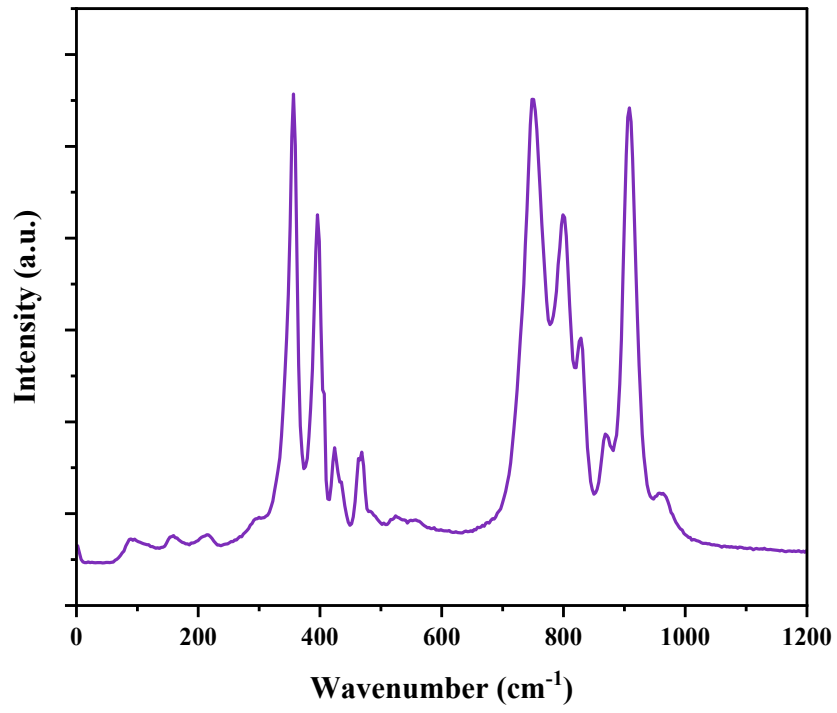

Figure. S4. The Raman spectrum of  $\text{Gd}_3\text{Ga}_5\text{O}_{12}:\text{Yb}^{3+}\text{-Er}^{3+}\text{-Cr}^{3+}$
